# Supplementary material for: Cytomegalovirus Viremia after Living and Deceased Donation in Kidney Transplantation
Source: MDPI journal article supplement (doi:10.3390/jcm9010252), 2020-01-17
Supplement: s1 [file s1]

Supplementary Materials: The following are available online at [www.mdpi.com/xxx/s1](http://www.mdpi.com/xxx/s1)

**Figure S1: Overall graft survival according to the development of a CMV-infection.**

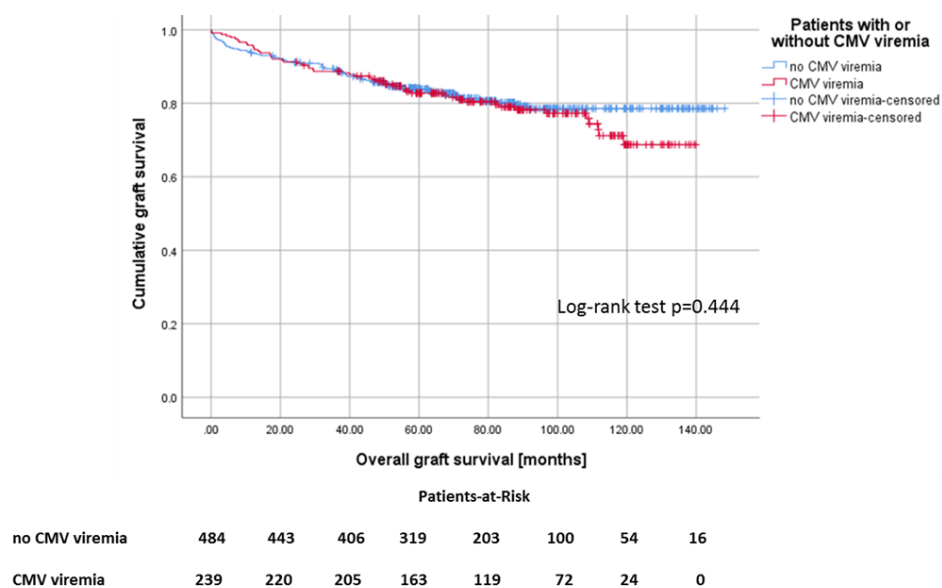

**Suppl. Figure 1:** Kaplan Meier plot for overall graft survival, Log Rank:  $p=0.444$  according to the development of a CMV-infection.

**Figure S2: Incidence of CMV viremia according to the CMV mismatch in the first year after transplantation.**

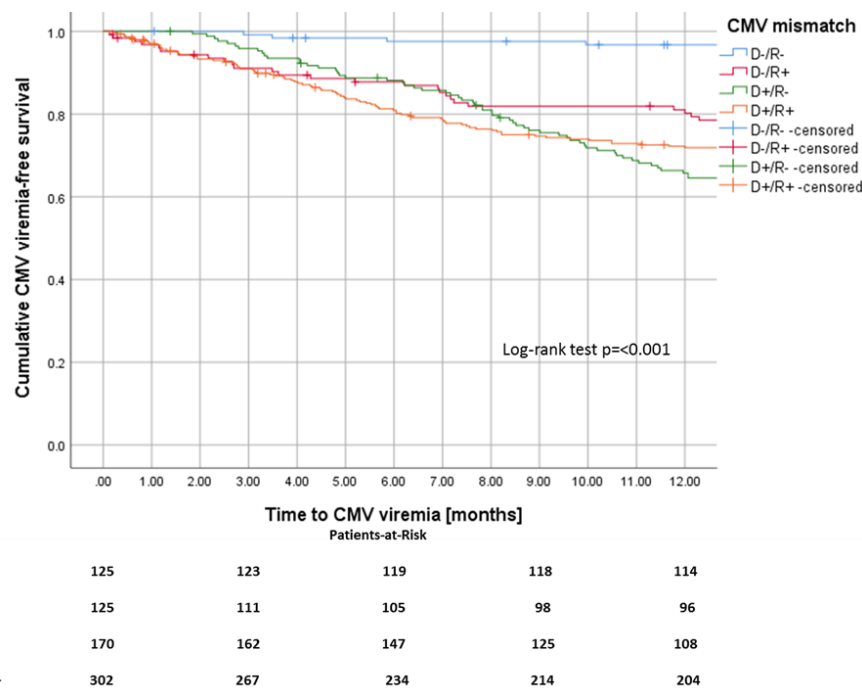

**Suppl. Figure 2:** Kaplan Meier plot for the incidence of CMV viremia according to the CMV mismatch in the first 12 months after transplantation in detail, Log Rank:  $p<0.001$ .
